# Supplementary material for: An Au–Ag@Au fiber surface plasmon resonance sensor for highly sensitive detection of fluoroquinolone residues
Source: Royal Society of Chemistry journal article supplement (doi:10.1039/d4an01162g), 2025-01-01
Supplement: d4an01162g1.pdf [file d4an01162g1.pdf]

Supporting information

**Au-Ag@Au fiber surface plasmon resonance sensor for highly sensitive detection of fluoroquinolones residue**

Qiang Xu <sup>a,b</sup>, Huiting Yin <sup>b,\*</sup>, Ze Zhao <sup>c</sup>, Mei Cui <sup>c</sup>, Renliang Huang <sup>a</sup> and Rongxin Su <sup>a,b,c,\*</sup>

<sup>a</sup> Tianjin Key Laboratory for Marine Environmental Research and Service, School of Marine Science and Technology, Tianjin University, Tianjin 300072, PR China. E-mail: [surx@tju.edu.cn](mailto:surx@tju.edu.cn)

<sup>b</sup> Zhejiang Institute of Tianjin University, Ningbo Key Laboratory of Green Petrochemical Carbon Emission Reduction Technology and Equipment, Ningbo, Zhejiang, 315201, PR China. E-mail: [yinht97@tju.edu.cn](mailto:yinht97@tju.edu.cn)

<sup>c</sup> State Key Laboratory of Chemical Engineering, Tianjin Key Laboratory of Membrane Science and Desalination Technology, School of Chemical Engineering and Technology, Tianjin University, Tianjin 300072, PR China

\* Correspondence and requests for materials should be addressed to R. S. (email: [surx@tju.edu.cn](mailto:surx@tju.edu.cn))

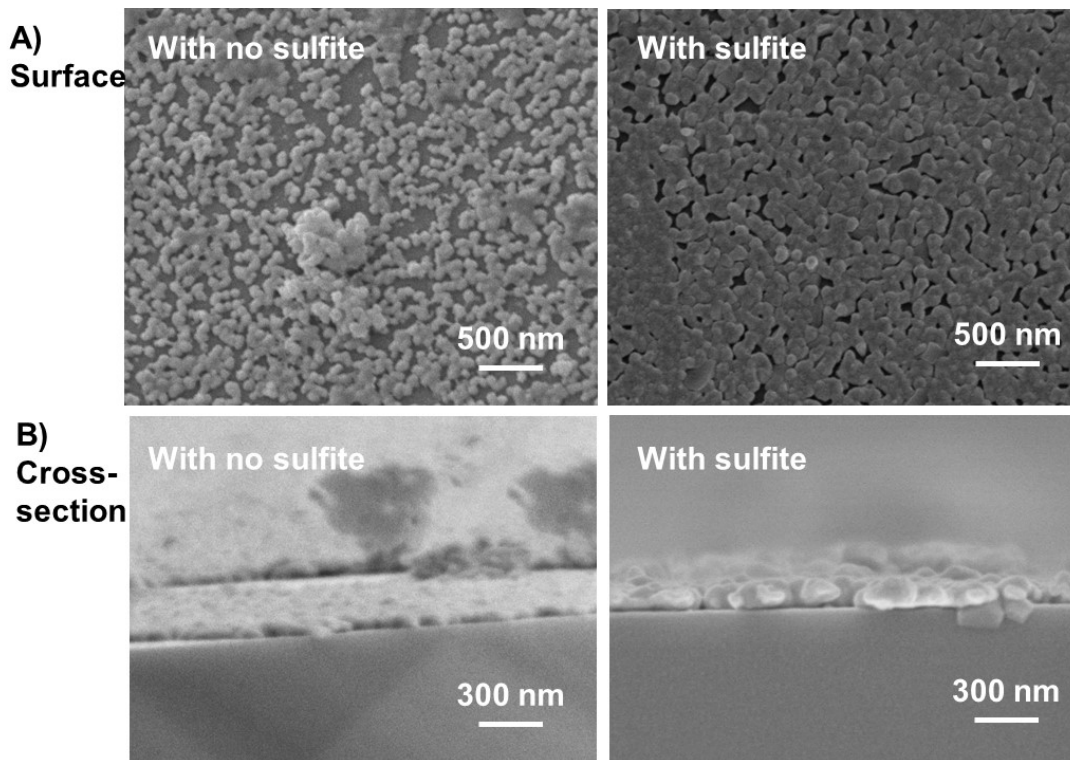

Fig.S1 SEM images of the surfaces A) and cross-sections B) of sensors prepared with or without sodium sulfite

As shown in Fig. S1, if sodium sulfite is not added, the surface distribution of the Au-Ag nanoparticle was uneven and the metal layer formation was not complete. Without the addition of sodium sulfite, the silver nanoparticles will be used as etching template to deposit Au film through the current galvanic replacement reactions. The SPR reflectance spectra (as shown in Fig. 4e-f) shows a small resonance wavelength shift, and even the reflection spectra of different solutions overlap. The resonance wavelength shift of the sensor is 0 under the change of refractive index, indicating that the SPR effect is very weak. What's more, it shows a nonlinear relationship in the relationship curve between the resonance wavelength and the refractive index of the solvent. When the sodium sulfite is added, it can be as a coordination aid to the epitaxial growth of Au for more complete gold film growth.

Table S1. Comparative results with other recoveries reported in the literature.

| Target Analytes        | Detection Methods              | LOD                                                           | Recovery (%)                        | Refs. |
|------------------------|--------------------------------|---------------------------------------------------------------|-------------------------------------|-------|
| Melamine               | Label-free fluorescence        | 0.12 $\mu\text{M}$                                            | 82.6-97.2                           | 1     |
| Enro                   | Elisa                          | 0.7 $\text{ng mL}^{-1}$                                       | 72.9-113.36                         | 2     |
| Enro                   | Fluorescent probe              | 8 $\text{ng mL}^{-1}$                                         | 83.7-87.7                           | 3     |
| Enro/Cip               | Molecularly imprinted polymers | 16 $\text{ng mL}^{-1}$ (Enro)<br>19 $\text{ng mL}^{-1}$ (Cip) | 82.6-93.5 (Enro)<br>81.2-94.8 (Cip) | 4     |
| Quinolones antibiotics | SERS detection                 | 0.37 $\text{pg mL}^{-1}$                                      | 86-121                              | 5     |
| Enro                   | Polymer-grafted nanographite   | 8.5 $\text{ngs mL}^{-1}$                                      | 68.5-81.2                           | 6     |
| Cip                    | Fluorescent probe              | 0.053 $\text{ng/mL}$                                          | 80.1-102.48                         | 7     |

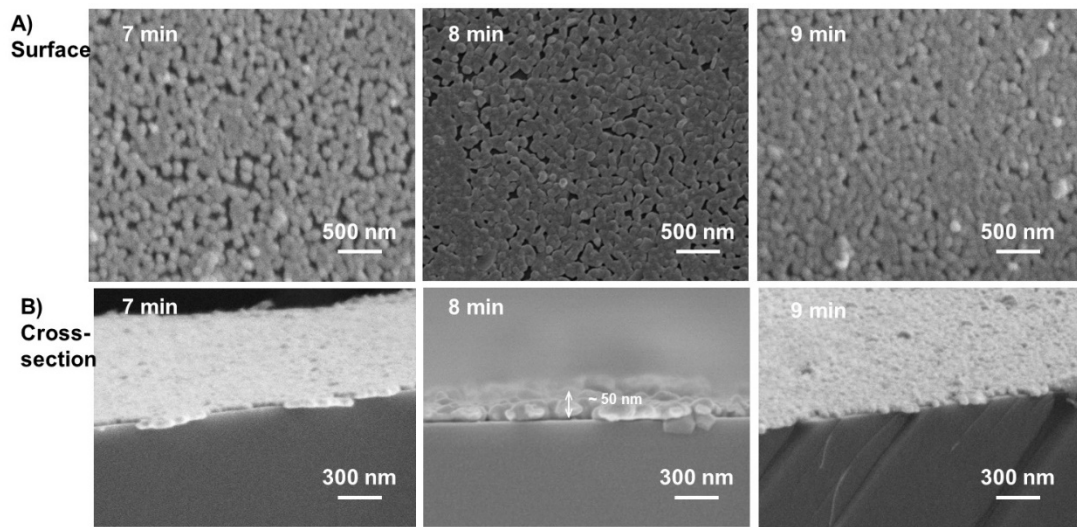

Fig.S2 SEM images of the surfaces A) and cross-sections B) of sensors prepared with different plating times.

The Au plating time of is an important factor affecting the sensitivity and spectral distribution of the sensor and it is related to the size of the nanoparticles and the thickness of the gold film. The size and growth of Au-Ag nanoparticles have a significant impact on wavelength shift. As shown in Fig. S2, the Au-Ag nanoparticles become larger with the longer time of gold plating. In addition, Au-Ag nanoparticles are considered to be a "quasi-silver" material with gold-like surface chemistry, and the ultra-thin gold shell helps to protect the internal silver core and avoid external influences on surface plasmon resonance, thereby improving the biocompatibility and signal stability of the particles. In addition, the surface plasmon resonance effect formed by the gap between the gold shell and the silver core can generate a powerful electromagnetic field.

## References

- 1 C. M. Gu, Y. Xiang, H. L. Guo and H. C. Shi, *ANALYST*, 2016, 141, 4511-4517.
- 2 N.-G. Kim, M.-A. Kim, Y.-I. Park, T.-S. Jung, S.-W. Son, B. So and H.-G. Kang, *JOURNAL OF VETERINARY SCIENCE*, 2015, 16, 431-437.
- 3 Y. W. Tang, M. Li, X. Gao, X. Y. Liu, J. W. Gao, T. Ma and J. R. Li, *MICROCHIMICA ACTA*, 2017, 184, 3469-3475.
- 4 H. Yan, M. Tian and K. H. Row, *JOURNAL OF SEPARATION SCIENCE*, 2008, 31, 3015-3020.
- 5 Q. Shi, J. Huang, Y. Sun, R. Deng, M. Teng, Q. Li, Y. Yang, X. Hu, Z. Zhang and G. Zhang, *Microchimica Acta*, 2018, 185, 84.
- 6 E. Moniri, H. A. Panahi and A. Alimadadi, *CHROMATOGRAPHIA*, 2016, 79, 293-301.
- 7 J. a. Chen, Y. Jin, T. Ren, S. Wang, X. Wang, F. Zhang and Y. Tang, *FOOD CHEMISTRY*, 2022, 386.
